# Supplementary material for: A Zn-doped BiOI microsponge-based photocatalyst material for complete photodegradation of environmental contaminants
Source: Royal Society of Chemistry journal article supplement (doi:10.1039/d1nj03415d), 2021-01-01
Supplement: d1nj03415d1.pdf [file d1nj03415d1.pdf]

**Zn doped BiOI microsponges based photocatalyst material for complete photodegradation of environmental contaminants**

Neetu Talreja<sup>1,2\*</sup>, Mohammad Ashfaq<sup>1,2,3</sup>, Divya Chauhan<sup>4</sup>, Adriana C. Mera<sup>1</sup>, C. A. Rodríguez<sup>1</sup>, R.V. Mangalaraja<sup>2\*</sup>

<sup>1</sup>Multidisciplinary Research Institute for Science and Technology, IIMCT, University of La Serena, 1015 Juan Cisternas St., La Serena, Chile.

<sup>2</sup>Advanced Ceramics and Nanotechnology Laboratory, Department of Materials Engineering, Faculty of Engineering, University of Concepción, Concepción 4070409, Chile.

<sup>3</sup>School of Life Science, BS Abdur Rahman Crescent Institute of Science and Technology, Chennai, 600048, India.

<sup>4</sup>Department of Chemical and Biomedical Engineering, University of South Florida, Tampa, FL, United States.

Corresponding Authors: [neetutalreja99@gmail.com](mailto:neetutalreja99@gmail.com) (Neetu Talreja), [mangal@udec.cl](mailto:mangal@udec.cl) (R.V. Mangalaraja)

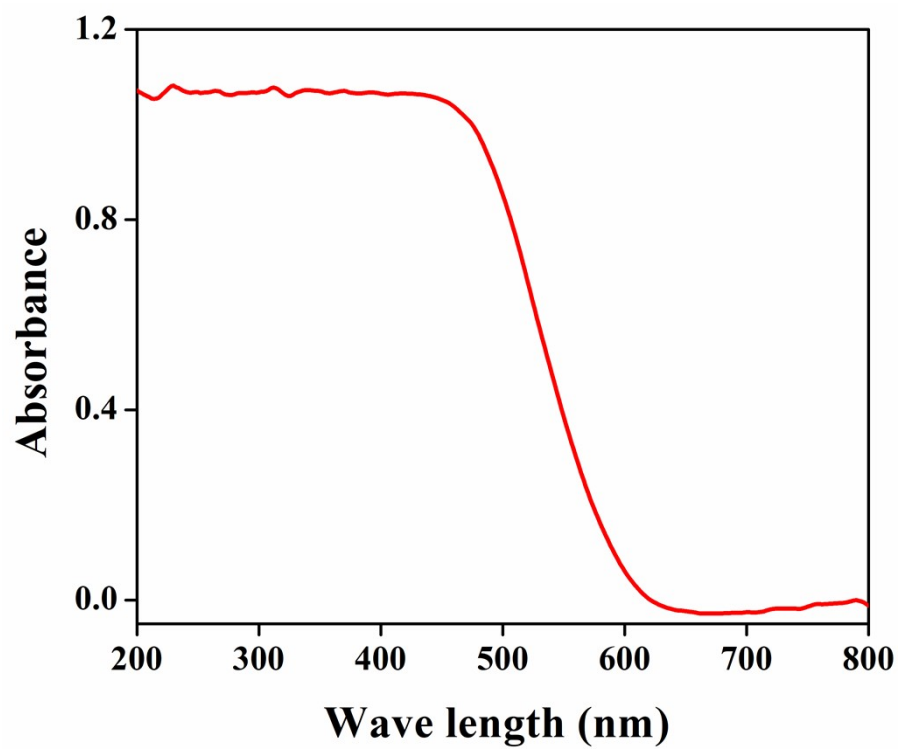

**Fig. S1.** UV-VIS diffused spectra of the Zn-BiOI based photocatalyst materials.
